# Supplementary material for: Community-Driven Insights into Fish Assemblage, Microhabitats, and Management Strategies in the Meghna River Basin of Bangladesh
Source: MDPI journal article supplement (doi:10.3390/su151411466), 2023-07-24
Supplement: s1 [file s1]

**Table S1.** Summary of study areas and methodological tools utilized in the study.

| District   | Study Sites  |                                                                           |              | Methods and sample size* |     |     |
|------------|--------------|---------------------------------------------------------------------------|--------------|--------------------------|-----|-----|
|            | Sub-district | Villages                                                                  | Major rivers | II                       | KII | FGD |
| Barguna    | Amtali       | Locha, Arpangashia, Angulkata, Tarikata and Sobujbag                      | Payra        | 20                       | 6   | 3   |
| Bhola      | Char Fasson  | Bodorpur, Mohajonpur, Foridabad, Betua and Char Newton                    | Meghna       | 20                       | 6   | 6   |
|            | Daulatkhan   | Saidpur, Choukighat, Chorkhalifa Chorpata and Char Borolanchi             | Meghna       | 20                       | 6   | 4   |
| Chandpur   | Haimchar     | Lamchor, Char koralia, Majorchar, Mollakandi and Kestopur                 | Meghna       | 20                       | 7   | 5   |
| Patuakhali | Kalapara     | Fashipara, Fotapur, Rahmatpur, Nijampur and Kaliapur                      | Andarmanik   | 20                       | 6   | 4   |
| Barisal    | Hizla        | Uttar Bausia, Dakkhin Bausia, Purbo Palpara, Poshchim Palpara and Tumchar | Meghna       | 20                       | 5   | 3   |
| Total      | 6            | 30                                                                        |              | 120                      | 36  | 25  |

\*II: Individual interview; FGD: Focus group discussions; KII: Key informant interviews.

## Questionnaire S1: Questionnaire for Fishers

### Part I: Demographic Information of the Respondents

- 1.1 Name of respondent: .....
- 1.2 Father's name: .....
- 1.3 Mother's name: .....
- 1.4 Address: Village: ..... Union: .....  
Upazila: ..... District: .....
- 1.5 Mobile no: .....
- 1.6 Age (year) .....
- 1.7 Sex: Male ☐ Female ☐
- 1.8 Marital status: .....
- 1.9 Educational status: .....
- 1.10 Occupation: Primary: .....  
Secondary: .....
- 1.11 Household members: Male: ..... Female: .....
- 1.12 Monthly income (BDT): .....
- 1.13 Number of working day per month (Day): .....
- 1.14 Household building materials:
- 1.14.1 Wall: .....
- 1.14.2 Floor: .....
- 1.14.3 Rooftop: .....

### Part II: Knowledge on fisheries resources and ecosystems

- 2.1 What resources/ecosystem(s) fish are coming in your fishing area?  
.....
- 2.2 What is the name of river and location in your fishing area (using Map of the area)?  
.....
- 2.3 Write down the fish which are currently available<sup>1</sup>? (put × where appropriate)

| SL | Name of species | High | Medium | Less |
|----|-----------------|------|--------|------|
|    |                 |      |        |      |
|    |                 |      |        |      |
|    |                 |      |        |      |
|    |                 |      |        |      |
|    |                 |      |        |      |
|    |                 |      |        |      |
|    |                 |      |        |      |

---

<sup>1</sup> Abundant - supply of fish is available throughout the year

2. 4 What types of fish were available in earlier days (10-20 years) and why?

| SL | Name of species | Why it is? |
|----|-----------------|------------|
| 1  |                 |            |
| 2  |                 |            |
| 3  |                 |            |
| 4  |                 |            |
| 5  |                 |            |
| 6  |                 |            |
| 7  |                 |            |
| 8  |                 |            |
| 9  |                 |            |
| 10 |                 |            |

2.5 What are the different stages of fish commonly caught in your fishing area?

| SL | Species | Juvenile | Adult | Spent |
|----|---------|----------|-------|-------|
| 1  |         |          |       |       |
| 2  |         |          |       |       |
| 3  |         |          |       |       |
| 4  |         |          |       |       |
| 5  |         |          |       |       |
| 6  |         |          |       |       |
| 7  |         |          |       |       |
| 8  |         |          |       |       |
| 9  |         |          |       |       |
| 10 |         |          |       |       |

## 2.6 Gear used, species caught and what are the effects on ecosystem

| SL | Name of gear | Species caught | Effect on the Ecosystem |
|----|--------------|----------------|-------------------------|
| 1  |              |                |                         |
| 2  |              |                |                         |
| 3  |              |                |                         |
| 4  |              |                |                         |
| 5  |              |                |                         |

### 2.7 List top ten important species in your fishing area

| SL | Name of species | Why important |
|----|-----------------|---------------|
| 1  |                 |               |
| 2  |                 |               |
| 3  |                 |               |
| 4  |                 |               |
| 5  |                 |               |
| 6  |                 |               |
| 7  |                 |               |
| 8  |                 |               |
| 9  |                 |               |
| 10 |                 |               |

2.8 In which season the fishes are available, more available and less available?

[illegible]

2.10 In which location of the river the fishes are found? (priority species, using Map)

| SL | Species | Features                    |                  |                     | Remarks if any |
|----|---------|-----------------------------|------------------|---------------------|----------------|
|    |         | Location with boundary (km) | Why use* (B/F/N) | Life stage** J//A/B |                |
| 1  |         |                             |                  |                     |                |
| 2  |         |                             |                  |                     |                |
| 3  |         |                             |                  |                     |                |
| 4  |         |                             |                  |                     |                |
| 5  |         |                             |                  |                     |                |
| 6  |         |                             |                  |                     |                |
| 7  |         |                             |                  |                     |                |
| 8  |         |                             |                  |                     |                |
| 9  |         |                             |                  |                     |                |
| 10 |         |                             |                  |                     |                |

\*\*J=Juvenile, A=Adult, B=Brood; \*B=breeding, N=nursery, F=feeding ground

3 Abundance of major fishes in relation to micro habitats

| SL | Features        | Types of Fishes Available | Remarks |
|----|-----------------|---------------------------|---------|
| 1  | Stiff slope     |                           |         |
| 2  | Gentle slope    |                           |         |
| 3  | Scour           |                           |         |
| 4  | River Trench    |                           |         |
| 5  | Char            |                           |         |
| 7  | Erosion of dike |                           |         |

4. Do you think the fish habitat is changing? Yes/No. If Yes then why?

5. Do you observed any change in ecosystem? Yes/No. If Yes then what are the changes and why?

6. What are the factors or drivers that regulate and/or negatively affect the ecosystem?

7. Do you have any suggestions for better management of the ecosystem in the Meghna River Basin?
